# Supplementary material for: Modulating the cobalt dose range to manipulate multisystem cooperation in bone environment: a strategy to resolve the controversies about cobalt use for orthopedic applications
Source: PubMed Central journal article supplement (PMC6956813; doi:10.7150/thno.37931), 2020-01-01
Supplement: thnov10p1074s1.pdf [file thnov10p1074s1.pdf]

**Supplementary Table 1. RT-qPCR primers applied in this study**

| <b>Genes</b>                   | <b>Primer sequences</b>                                                                                 |
|--------------------------------|---------------------------------------------------------------------------------------------------------|
| <b>TNF<math>\alpha</math></b>  | <b>Forward:</b> 5'- GGATCTCAAAGACAACCAAC -3'<br><b>Reverse:</b> 5'- ACAGAGCAATGACTCCAAAG -3'            |
| <b>IFN<math>\gamma</math></b>  | <b>Forward:</b> 5'- GTGTCATCGAATCGCACCTG -3'<br><b>Reverse:</b> 5'- GTTCACCTCGAACTTGGCGA -3'            |
| <b>IL1<math>\beta</math></b>   | <b>Forward:</b> 5'- TCTGTGACTCGTGGGATGAT -3'<br><b>Reverse:</b> 5'- CTTCTTTGGGTATTGTTTGG -3'            |
| <b>IL6</b>                     | <b>Forward:</b> 5'- TGATGGATGCTTCCAAACTG -3'<br><b>Reverse:</b> 5'- GAGCATTGGAAGTTGGGGTA -3'            |
| <b>IL10</b>                    | <b>Forward:</b> 5'- TCCGGGGTGACAATAACTGC -3'<br><b>Reverse:</b> 5'- TGGCCTTGTAGACACCTTTGT -3'           |
| <b>IL-1Ra</b>                  | <b>Forward:</b> 5'- GACCTTCTACCTGAGGAACAACCAG -3'<br><b>Reverse:</b> 5'- AAGAACACATTCCGAAAGTCAATAGG -3' |
| <b>TGF<math>\beta</math>1</b>  | <b>Forward:</b> 5'- GGAAATCAATGGGATCAGTC -3'<br><b>Reverse:</b> 5'- CTGAAGCAGTAGTTGGTATC -3'            |
| <b>TGF<math>\beta</math>3</b>  | <b>Forward:</b> 5'- GTTTACCAAGCCAAAGTCC -3'<br><b>Reverse:</b> 5'- GGTGTCTAGCCAAATGTCC -3'              |
| <b>OPG</b>                     | <b>Forward:</b> 5'- AAGGAAATGCAACACATGAC -3'<br><b>Reverse:</b> 5'- TCTCTACACTCTCTGCATTC -3'            |
| <b>RANKL</b>                   | <b>Forward:</b> 5'- CTCATGCAGGAGAATCAAAC -3'<br><b>Reverse:</b> 5'- TTCCATCATAGCTGGAAGTC -3'            |
| <b>RANK</b>                    | <b>Forward:</b> 5'- AAAACGCTGACAGCTAATC -3'<br><b>Reverse:</b> 5'- AGTCTTCTGGAACCATCTTC -3'             |
| <b>TRAF6</b>                   | <b>Forward:</b> 5'- GCCCATGCCGTATGAAGAGA -3'<br><b>Reverse:</b> 5'- ACTGAATGTGCAGGGGACTG -3'            |
| <b>NF-<math>\kappa</math>B</b> | <b>Forward:</b> 5'- AACACTGCCGAGCTCAAGAT -3'<br><b>Reverse:</b> 5'- CATCGGCTTGAGAAAAGGAG -3'            |
| <b>I<math>\kappa</math>B</b>   | <b>Forward:</b> 5'- CCTCACCCCTCCCAATAAT -3'<br><b>Reverse:</b> 5'- GTGTGAATGGTGCCTGTGAC -3'             |
| <b>JNK</b>                     | <b>Forward:</b> 5'- CAAGGAGGTCATGGATTTGG -3'<br><b>Reverse:</b> 5'- AAGACGACGGATGCTGAGAG -3'            |
| <b>OSM</b>                     | <b>Forward:</b> 5'- GAGAACACTGCTTAGTTTGG -3'<br><b>Reverse:</b> 5'- AGGTTTTGGTGGAGGATATAG -3'           |
| <b>STAT3</b>                   | <b>Forward:</b> 5'- GATTCATTGATGCAGTTTGG -3'<br><b>Reverse:</b> 5'- GGTGTCTCAGTCATACTCTG -3'            |
| <b>OPN</b>                     | <b>Forward:</b> 5'- CCAAGCGTGGAAACACACAGCC -3'<br><b>Reverse:</b> 5'- GGCTTTGGAAGTCGCCTGACTG -3'        |
| <b>OCN</b>                     | <b>Forward:</b> 5'- ACCCTCTCTGCTCACTCTGC -3'<br><b>Reverse:</b> 5'- TATTCACCACCTTACTGCCCTCC -3'         |
| <b>BSP</b>                     | <b>Forward:</b> 5'- AAGCATGCCTACTTTTATCC -3'<br><b>Reverse:</b> 5'- CTTCAATTTGAAGTCTCCTCTTC -3'         |
| <b>ALP</b>                     | <b>Forward:</b> 5'- ATGTCTGGAACCGCACTGAAC -3'<br><b>Reverse:</b> 5'- AGCCTTTGGGATTCTTTGTGTCAG -3'       |

|                  |                                                                                                       |
|------------------|-------------------------------------------------------------------------------------------------------|
| <b>RUNX2</b>     | <b>Forward:</b> 5'- CAGTATGAGAGTAGGTGTCCCGC -3'<br><b>Reverse:</b> 5'- AAGAGGGGTAAGACTGGTCATAGG -3'   |
| <b>BMP2</b>      | <b>Forward:</b> 5'- ATGGGTTTGTGGTGGAAAGTG -3'<br><b>Reverse:</b> 5'- AGTTCAGGTGATCAGCCAGG -3'         |
| <b>BMP6</b>      | <b>Forward:</b> 5'- AAAAGGAGATCCTGTCCG -3'<br><b>Reverse:</b> 5'- AGAGATCCAGCATGAAGAG -3'             |
| <b>COL1A1</b>    | <b>Forward:</b> 5'- CCCCAAGGAGAAGAAGCATG -3'<br><b>Reverse:</b> 5'- GAATCGACTGTTGCCTTCGC -3'          |
| <b>Wnt5a</b>     | <b>Forward:</b> 5'- CTTCCAAGTTCTTCTAATGG -3'<br><b>Reverse:</b> 5'- TTAGGGACCACCAAGAATTAG -3'         |
| <b>Wnt3a</b>     | <b>Forward:</b> 5'- AACACAGCAGCTTAATGAC -3'<br><b>Reverse:</b> 5'- ATCTCCACGTAGTTCCTG -3'             |
| <b>Wnt10b</b>    | <b>Forward:</b> 5'- GTAATCACGACATGGACTTTG -3'<br><b>Reverse:</b> 5'- CTCCAACAGGTCTTGAATTG -3'         |
| <b>Axin2</b>     | <b>Forward:</b> 5'- GAATACGAAAGGCACAGAAC -3'<br><b>Reverse:</b> 5'- CTTATGCTTTGGGTAATATGG -3'         |
| <b>β-catenin</b> | <b>Forward:</b> 5'- CATTGGTGCCAGGGAGAAG -3'<br><b>Reverse:</b> 5'- CCACCCATCTCATGCTCCATC -3'          |
| <b>VEGFA</b>     | <b>Forward:</b> 5'- CAATGATGAAGCCCTGGAGTG -3'<br><b>Reverse:</b> 5'- GCTCATCTCTCCTATGTGCTGG -3'       |
| <b>PDGFa</b>     | <b>Forward:</b> 5'- CGACTCTTGGAGATAGACTC -3'<br><b>Reverse:</b> 5'- CTTCTCAATACTTCTCTTCC -3'          |
| <b>PDGFb</b>     | <b>Forward:</b> 5'- AGATCTCGCGGAACCTCATC -3'<br><b>Reverse:</b> 5'- AGGGTCACTGTGGCCTTCTT -3'          |
| <b>MMP9</b>      | <b>Forward:</b> 5'- TACTTTGGAAACGCAAATGG -3'<br><b>Reverse:</b> 5'- GTGTAGAGATTCTCACTGGG -3'          |
| <b>CD31</b>      | <b>Forward:</b> 5'- GATCTCCATCCTGTCCGGTAAC -3'<br><b>Reverse:</b> 5'- GTGTCATTCACGGTTTCTTCGT -3'      |
| <b>eNOS</b>      | <b>Forward:</b> 5'- CAAGACCGATTACACGACATTGAGA -3'<br><b>Reverse:</b> 5'- TGAGGACTTGTCCAAACACTCCAC -3' |
| <b>Ang-1</b>     | <b>Forward:</b> 5'- TAACCTCGCCCTGCAAAGAG -3'<br><b>Reverse:</b> 5'- CTGTATGCTTGCAGGTGGTGAT -3'        |
| <b>α-SMA</b>     | <b>Forward:</b> 5'- CAACCCCTATACAACCATCACAC -3'<br><b>Reverse:</b> 5'- CCCAAACTGCTTGCCTAACC -3'       |
| <b>GAPDH</b>     | <b>Forward:</b> 5'- TCAGCAATGCCTCCTGCAC -3'<br><b>Reverse:</b> 5'- TCTGGGTGGCAGTGATGGC -3'            |

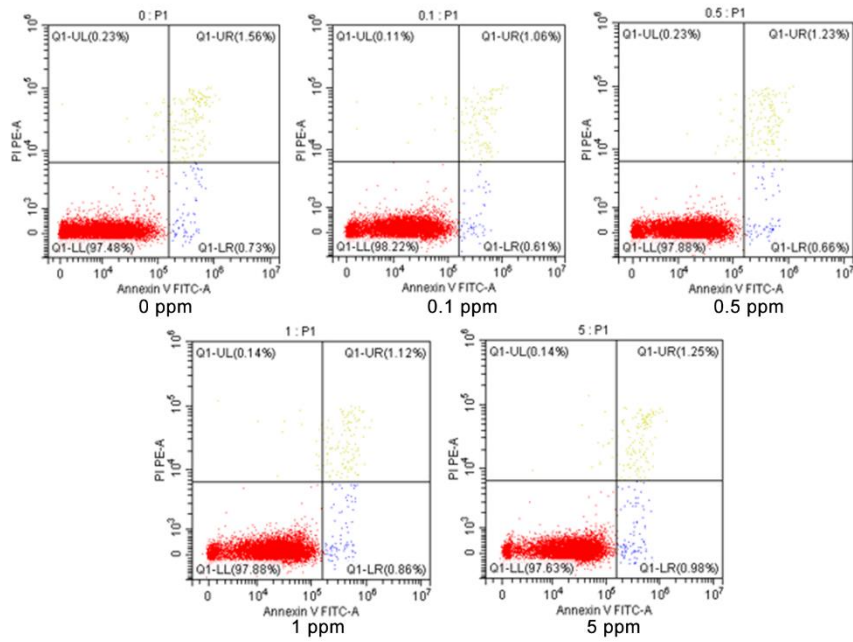

**Supplementary Figure1.** Cellular toxicity of Cobalt on PBMCs. Flow cytometry illustrates the apoptosis of PBMCs at different concentrations of  $\text{CoCl}_2$  (0, 0.1, 0.5, 1, or 5 ppm) after the cobalt stimulation for 2 days.
